# Supplementary material
Source: PubMed Central journal article supplement (PMC6752009)
Supplement: AEM.01202-19-s0001.pdf [file AEM.01202-19-s0001.pdf]

## Supplemental material

### Supplemental tables

**Table S1:** Mosquitoes collected from different region of Texas and Chicago used in this study

| Pool ID        | Location        | Collection date | Trap type | mosquito species      | sample type | # per pool |
|----------------|-----------------|-----------------|-----------|-----------------------|-------------|------------|
| SA2016Cu#7     | San Antonio, TX | 6/26/16         | BG        | <i>Cx. quinq.</i>     | Mosquito    | 7          |
| SA2016Cu#8     | San Antonio, TX | 7/2/16          | BG        | <i>Cx. quinq.</i>     | Mosquito    | 6          |
| SA2016Aae#11   | San Antonio, TX | 8/22/16         | BG        | <i>Ae. aegypti</i>    | Mosquito    | 13         |
| SA2016Aae#20   | San Antonio, TX | 8/22/16         | BG        | <i>Ae. aegypti</i>    | Mosquito    | 20         |
| SA2016Aalbo#22 | San Antonio, TX | 10/15/16        | BG        | <i>Ae. albopictus</i> | Mosquito    | 16         |
| SA2016Aalbo#23 | San Antonio, TX | 10/15/16        | BG        | <i>Ae. albopictus</i> | Mosquito    | 20         |
| LRGV16-184     | LRGV, TX        | 10/27/16        | AGO       | <i>Cx. quinq.</i>     | Mosquito    | 8          |
| LRGV16-159     | LRGV, TX        | 10/19/16        | AGO       | <i>Cx. quinq.</i>     | Mosquito    | 17         |

|              |                     |          |           |                       |          |    |
|--------------|---------------------|----------|-----------|-----------------------|----------|----|
| LRGV16-157   | LRGV, TX            | 10/19/16 | AGO       | <i>Ae. aegypti</i>    | Mosquito | 6  |
| LRGV16-166   | LRGV, TX            | 10/24/16 | AGO       | <i>Ae. aegypti</i>    | Mosquito | 6  |
| LRGV16-163   | LRGV, TX            | 10/24/16 | AGO       | <i>Ae. aegypti</i>    | Mosquito | 13 |
| LRGV16-155   | LRGV, TX            | 10/19/16 | AGO       | <i>Ae. albopictus</i> | Mosquito | 1  |
| LRGV16-162   | LRGV, TX            | 10/24/16 | AGO       | <i>Ae. albopictus</i> | Mosquito | 1  |
| CSCx13-259   | College Station, TX | 6/5/16   | BG        | <i>Cx. quinq.</i>     | Mosquito | 50 |
| CSCx13-352   | College Station, TX | 6/5/16   | BG        | <i>Cx. quinq.</i>     | Mosquito | 50 |
| CSWNV10-7163 | Chicago, IL         | 8/13/10  | BG        | <i>Culex</i> sp.      | Mosquito | 20 |
| CSWNV10-9531 | Chicago, IL         | 9/2/10   | BG        | <i>Culex</i> sp.      | Mosquito | 50 |
| CSAL-1104    | College Station, TX | 6/20/16  | BG        | <i>Ae. albopictus</i> | Mosquito | 2  |
| CSAL-1270    | College Station, TX | 6/26/16  | BG        | <i>Ae. albopictus</i> | Mosquito | 3  |
| CSAL-1781    | College Station, TX | 7/12/16  | BG        | <i>Ae. albopictus</i> | Mosquito | 4  |
| ZIKV-CTL     | Colony              | 11/9/16  | Aspirator | <i>Ae. aegypti</i>    | Spiked   | 10 |
| ZIKV-CTL     | Colony              | 11/9/16  | Aspirator | <i>Ae. aegypti</i>    | Spiked   | 10 |

|            |          |          |           |                       |          |    |
|------------|----------|----------|-----------|-----------------------|----------|----|
| 31         | LRGV, TX | 11/28/16 | BG        | <i>Ae. aegypti</i>    | Mosquito | 24 |
| 34         | LRGV, TX | 12/21/16 | Aspirator | <i>Ae. aegypti</i>    | Mosquito | 9  |
| 16-306     | LRVG, TX | 11/15/16 | AGO       | <i>Ae. aegypti</i>    | Mosquito | 10 |
| 16-363     | LRVG, TX | 11/23/16 | BG        | <i>Ae. aegypti</i>    | Mosquito | 13 |
| 16-391     | LRVG, TX | 11/30/16 | AGO       | <i>Ae. aegypti</i>    | Mosquito | 9  |
| 16-462     | LRGV, TX | 12/7/16  | AGO       | <i>Ae. aegypti</i>    | Mosquito | 6  |
| 16-419     | LRGV, TX | 12/2/16  | Aspirator | <i>Ae. albopictus</i> | Mosquito | 2  |
| 16-555     | LRGV, TX | 12/20/16 | AGO       | <i>Culex</i> sp.      | Mosquito | 6  |
| 16-568     | LRGV, TX | 12/21/16 | BG        | <i>Culex</i> sp.      | Mosquito | 10 |
| Ae_MG_1    | LRGV, TX | 10/10/17 | Aspirator | <i>Ae. aegypti</i>    | MG       | 23 |
| Ae_SG_1    | LRGV, TX | 10/10/17 | Aspirator | <i>Ae. aegypti</i>    | SG       | 23 |
| CU_MG_1    | LRGV, TX | 9/22/17  | Aspirator | <i>Culex</i> sp.      | MG       | 23 |
| CU_SG_1    | LRGV, TX | 9/22/17  | Aspirator | <i>Culex</i> sp.      | SG       | 23 |
| DENV-2 CTL | Colony   | 10/10/17 | Aspirator | <i>Ae. aegypti</i>    | Spiked   | 10 |

|                       |        |          |           |                                |        |       |
|-----------------------|--------|----------|-----------|--------------------------------|--------|-------|
| DENV-2 CTL            | Colony | 10/10/17 | Aspirator | <i>Ae. aegypti</i>             | Spiked | 10    |
| DENV-2 CTL            | Colony | 11/27/18 | Aspirator | <i>Ae. aegypti</i>             | Spiked | 10    |
| DENV-2 CTL            | Colony | 11/27/18 | Aspirator | <i>Ae. aegypti</i>             | Spiked | 10    |
| DENV-2 CTL + MAYV CTL | Colony | 11/27/18 | Aspirator | <i>Ae. aegypti</i>             | Spiked | 10    |
| DENV-2 CTL + MAYV CTL | Colony | 11/27/18 | Aspirator | <i>Ae. aegypti</i>             | Spiked | 10    |
| RVFV CTL              | Colony | 11/27/18 | Aspirator | <i>Cx. qinq.</i>               | Spiked | 10    |
| NEGATIVE CTL          | Colony | 10/10/17 | Aspirator | <i>Ae. aegypti + Cx. qinq.</i> | Spiked | 10+10 |

---

LRGV: Lower Rio Grande Valley, AGO: Autocidal Gravid Ovitrap, BG: Biogent, F

MG: midgut

SG: salivary gland

*Cx. qinq.* = *Cx. quinquefasciatus*

**Table S2:** Primers and probes use in the qPCR assay for LLMDA validation

| Genus      | Virus  | Target | Primer name    | Sequence 5' to 3'           | Reference |
|------------|--------|--------|----------------|-----------------------------|-----------|
| Flavivirus | ZIKV   | NS5    | ZIKV_835F      | TTGGTCATGATACTGCGATTGC      | (1)       |
|            | ZIKV   | NS5    | ZIKV_911R      | CCTCCACAAAGTCCCTATTGC       | (1)       |
|            | ZIKV   | NS5    | ZIKV_860_probe | CGGCATACAGCATCAGGTGCATAGGAG | (1)       |
|            | WNV    | ENV    | WNENV_F        | TCAGCGATCTCTCCACCAAAG       | (2)       |
|            | WNV    | ENV    | WNENV_R        | GGGTCAGCACGTTTGTTCATTG      | (2)       |
|            | WNV    | ENV    | WNENV_probe    | TGCCCCGACCATGGG             | (2)       |
|            | CxFLAV | ENV    | CxFV_E_F       | CACGCCGAACGGACTTCT          | (3)       |
|            | CxFLAV | ENV    | CxFV_E_R       | TCCATTGGCCGCATATATC         | (3)       |
|            | CxFLAV | ENV    | CxFV_FA_probe  | TTTCG CACCGGAGCAGCCG        | (3)       |

**Table S3:** Primers used for LLMDA validation of field samples using conventional PCR or qPCR assay

| Classification   | Specie                   | Target | Primer name              | Sequence 5' to 3'         | Product size (bp) | Reference |
|------------------|--------------------------|--------|--------------------------|---------------------------|-------------------|-----------|
| Virus            | CFAV                     | E      | CFAV_E F                 | AATGAGACCTGTTCGCTTAG      | 340               | (4)       |
| Flavivirus       | CFAV                     | E      | CFAV_E R                 | CGTTTGTCAATCAAGGCAG       | 340               | (4)       |
|                  | CxFLAV                   | NS5    | CxFV_9131 F <sup>a</sup> | TTGTGGTTCTTGCTGGACCAAGTG  | 206               | (5)       |
|                  | CxFLAV                   | NS5    | CxFV_9337 R <sup>a</sup> | ATTCTCCCAACCTGGTTCTTCCCA  | 206               | (5)       |
| Bacteria         | <i>Wolbachia</i> group A | wspA   | QAdir1 <sup>b</sup>      | GGG TTG ATG TTG AAG GAG   | -                 | (6)       |
| <i>Wolbachia</i> | <i>Wolbachia</i> group A | wspA   | QArev2 <sup>b</sup>      | CAC CAG CTT TTA CTT GAC C | -                 | (6)       |
|                  | <i>Wolbachia</i> group B | wspB   | 183F <sup>b</sup>        | AAG GAA CCG AAG TTC ATG   | -                 | (6)       |
|                  | <i>Wolbachia</i> group B | wspB   | QBrev2 <sup>b</sup>      | AGT TGT GAG TAA AGT CCC   | -                 | (6)       |

<sup>a</sup>: to be use as a nester PCR after FU2-CFD2

<sup>b</sup>: real-time quantitative SYBR PCR assay

**Table S4:** Summary of LLMDA probe hit detection

| Sample | Species               | Location        | LLMDA detection                                           | Score       | Probes<br>detected/observed |
|--------|-----------------------|-----------------|-----------------------------------------------------------|-------------|-----------------------------|
| 1      | <i>Cx. quinq.</i>     | San Antonio, TX | <i>Wolbachia pipientis</i> wAlbB                          | 199.7/199.7 | 55/59                       |
| 2      | <i>Cx. quinq.</i>     | San Antonio, TX | ND                                                        | ND          | ND                          |
| 3      | <i>Ae. aegypti</i>    | San Antonio, TX | CFAV                                                      | 77/77       | 21/21                       |
|        |                       |                 | <i>Klebsiella pneumoniae</i>                              | 25.1/25.1   | 10/13                       |
| 5      | <i>Ae. aegypti</i>    | San Antonio, TX | FAIL RUN                                                  | FAIL RUN    | FAIL RUN                    |
| 6      | <i>Ae. albopictus</i> | San Antonio, TX | <i>Wolbachia wVit of Nasonia vitripennis</i>              | 169.6/169.6 | 50/56                       |
| 7      | <i>Ae. albopictus</i> | San Antonio, TX | <i>Wolbachia pipientis</i> wAlbB                          | 51.8/51.8   | 39/59                       |
| 8      | <i>Cx. quinq.</i>     | LRGV, TX        | <i>Wolbachia pipientis</i> of <i>Cx. quinquefasciatus</i> | 129.4/129.4 | 46/58                       |

|    |                       |                     |                                                    |             |       |
|----|-----------------------|---------------------|----------------------------------------------------|-------------|-------|
| 9  | <i>Cx. quinq.</i>     | LRGV, TX            | ND                                                 | ND          | ND    |
| 10 | <i>Ae. aegypti</i>    | LRGV, TX            | ND                                                 | ND          | ND    |
| 11 | <i>Ae. aegypti</i>    | LRGV, TX            | Avian endogenous retrovirus                        | 74.9/74.9   | 23/23 |
| 12 | <i>Ae. aegypti</i>    | LRGV, TX            | ND                                                 | ND          |       |
| 13 | <i>Ae. albopictus</i> | LRGV, TX            | ND                                                 | ND          | ND    |
| 14 | <i>Ae. albopictus</i> | LRGV, TX            | <i>Wolbachia pipientis wAlbB</i>                   | 205.2/205.2 | 56/59 |
| 15 | <i>Cx. quinq.</i>     | College Station, TX | ND                                                 | ND          | ND    |
| 16 | <i>Cx. quinq.</i>     | College Station, TX | ND                                                 | ND          | ND    |
| 17 | <i>Culex spp</i>      | Chicago, IL         | WNV                                                | 115.3/115.3 | 58/79 |
|    |                       |                     | CxFLAV                                             | 74.7/74.7   | 19/19 |
| 18 | <i>Culex spp</i>      | Chicago, IL         | <i>Wolbachia pipientis of Cx. quinquefasciatus</i> | 95.5/95.5   | 42/58 |
| 20 | <i>Ae. albopictus</i> | College Station, TX | ND                                                 | ND          | ND    |
| 21 | <i>Ae. albopictus</i> | College Station, TX | <i>Comamonadaceae</i>                              | 52.8/52.8   | 21/26 |



|    |                       |                     |                           |           |          |
|----|-----------------------|---------------------|---------------------------|-----------|----------|
| 22 | <i>Ae. albopictus</i> | College Station, TX | ND                        | ND        | ND       |
| 23 | <i>Ae. aegypti</i>    | Colony              | <i>Erwinia pyrifoliae</i> | 14.8/14.8 | 23/37    |
|    |                       |                     | ZIKV                      | ND        | 3/27     |
|    |                       |                     | <i>Comamonadaceae</i>     | 65.7/65.7 | 23/26    |
| 25 | <i>Ae. aegypti</i>    | Colony              | <i>Erwinia pyrifoliae</i> | 44.5/44.5 | 27/37    |
|    |                       |                     | ZIKV                      | ND        | 3/27     |
|    |                       |                     | CFAV                      | 77/77     | 22/22    |
| 26 | <i>Ae. aegypti</i>    | LRGV, TX            | <i>Xanthomonadaceae</i>   | 87.4/87.4 | 25/25    |
|    |                       |                     | FAIL RUN                  | FAIL RUN  | FAIL RUN |
| 27 | <i>Ae. aegypti</i>    | LRGV, TX            | FAIL RUN                  | FAIL RUN  | FAIL RUN |
| 28 | <i>Ae. aegypti</i>    | LRVG, TX            | ND                        | ND        | ND       |
| 29 | <i>Ae. aegypti</i>    | LRVG, TX            | ND                        | ND        | ND       |
| 30 | <i>Ae. aegypti</i>    | LRVG, TX            | CFAV                      | 77/77     | 21/21    |
|    |                       |                     | <i>Comamonadaceae</i>     | 51.5/51.5 | 21/26    |
| 31 | <i>Ae. aegypti</i>    | LRGV, TX            | ND                        | ND        | ND       |

|    |                       |          |                          |           |       |
|----|-----------------------|----------|--------------------------|-----------|-------|
| 32 | <i>Ae. albopictus</i> | LRGV, TX | ND                       | ND        | ND    |
| 33 | <i>Culex</i> spp.     | LRGV, TX | <i>Pseudomonas fulva</i> | 91.8/91.8 | 58/91 |
| 34 | <i>Culex</i> spp.     | LRGV, TX | ND                       | ND        | ND    |
| 35 | <i>Ae. aegypti</i>    | LRGV, TX | CFAV                     | 77/77     | 21/21 |
| 36 | <i>Ae. aegypti</i>    | LRGV, TX | CFAV                     | 77/77     | 21/21 |
|    |                       |          | <i>Comonadaceae</i>      | 75.6/75.6 | 34/26 |
| 37 | <i>Culex</i> spp.     | LRGV, TX | <i>Silanimonas</i>       | 91.5/91.5 | 13/16 |
| 38 | <i>Culex</i> spp.     | LRGV, TX | <i>Xanthomonadaceae</i>  | 87.4/87.4 | 21/21 |
| 41 | <i>Ae. aegypti</i>    | Colony   | Densovirus               | 59        | 19/22 |
| 42 | <i>Ae. aegypti</i>    | Colony   | Densovirus               | 59        | 19/22 |
|    |                       |          | Densovirus               | 83.8      | 21/22 |
| 43 | <i>Ae. aegypti</i>    | Colony   | Dengue virus type 2      | 56.7      | 20/27 |
|    |                       |          | Densovirus               | 83.8      | 21/22 |
| 44 | <i>Ae. aegypti</i>    | Colony   | Dengue virus type 2      | 60.7      | 20/27 |

|    |                    |        |                                  |       |       |
|----|--------------------|--------|----------------------------------|-------|-------|
|    |                    |        | Densovirus                       | 83.8  | 21/22 |
| 45 | <i>Ae. aegypti</i> | Colony | Dengue virus type 2              | 187.1 | 47/49 |
|    |                    |        | Mayaro virus                     | 78.5  | 20/25 |
|    |                    |        | Densovirus                       | 92.3  | 22/22 |
| 46 | <i>Ae. aegypti</i> | Colony | Dengue virus type 2              | 224.6 | 53/54 |
|    |                    |        | Mayaro virus                     | 122.3 | 25/25 |
|    |                    |        | <i>Wolbachia pipientis wAlbB</i> | 277.2 | 52/55 |
| 47 | <i>Cx. quinq.</i>  | Colony | Rift Valley fever virus          | 52.8  | 16/19 |
|    | <i>Cx. quinq.</i>  |        |                                  |       |       |
| 48 | <i>Ae. aegypti</i> | Colony | <i>Wolbachia pipientis wAlbB</i> | 268   | 51/55 |

---

1. Lanciotti RS, Kosoy OL, Laven JJ, Velez JO, Lambert AJ, Johnson AJ, Stanfield SM, Duffy MR. 2008. Genetic and serologic properties of Zika virus associated with an epidemic, Yap State, Micronesia, 2007. *Emerg Infect Dis* 14:1232-9.
2. Lanciotti RS, Kerst AJ, Nasci RS, Godsey MS, Mitchell CJ, Savage HM, Komar N, Panella NA, Allen BC, Volpe KE, Davis BS, Roehrig JT. 2000. Rapid detection of West Nile virus from human clinical specimens, field-collected mosquitoes, and avian samples by a TaqMan reverse transcriptase-PCR assay. *J Clin Microbiol* 38:4066-71.
3. Liang W, He X, Liu G, Zhang S, Fu S, Wang M, Chen W, He Y, Tao X, Jiang H, Lin X, Gao X, Hu W, Liu Y, Feng L, Cao Y, Yang G, Jing C, Liang G, Wang H. 2015. Distribution and phylogenetic analysis of *Culex flavivirus* in mosquitoes in China. *Arch Virol* 160:2259-68.
4. Contreras-Gutierrez MA, Guzman H, Thangamani S, Vasilakis N, Tesh RB. 2017. Experimental Infection with and Maintenance of Cell Fusing Agent Virus (Flavivirus) in *Aedes aegypti*. *Am J Trop Med Hyg* 97:299-304.
5. Newman CM, Cerutti F, Anderson TK, Hamer GL, Walker ED, Kitron UD, Ruiz MO, Brawn JD, Goldberg TL. 2011. *Culex flavivirus* and West Nile virus mosquito coinfection and positive ecological association in Chicago, United States. *Vector Borne Zoonotic Dis* 11:1099-105.

6. Mousson L, Martin E, Zouache K, Madec Y, Mavingui P, Failloux AB. 2010. *Wolbachia* modulates Chikungunya replication in *Aedes albopictus*. Mol Ecol 19:1953-64.
